# Supplementary material for: Risk factors of postoperative pancreatic fistula in patients after distal pancreatectomy: a systematic review and meta-analysis
Source: PubMed Central journal article supplement (PMC5428241; doi:10.1038/s41598-017-00311-8), 2017-03-15
Supplement: 41598_2017_311_MOESM1_ESM.pdf [file 41598_2017_311_MOESM1_ESM.pdf]

**Risk factors of postoperative pancreatic fistula in patients after distal  
pancreatectomy: a systematic review and meta-analysis.**

**Yun-Peng Peng, Xiao-Le Zhu, Ling-Di Yin, Yi Zhu , Ji-Shu Wei, Jun-Li Wu, Yi Miao**

# Supplementary Data

## Supplementary Fig 1

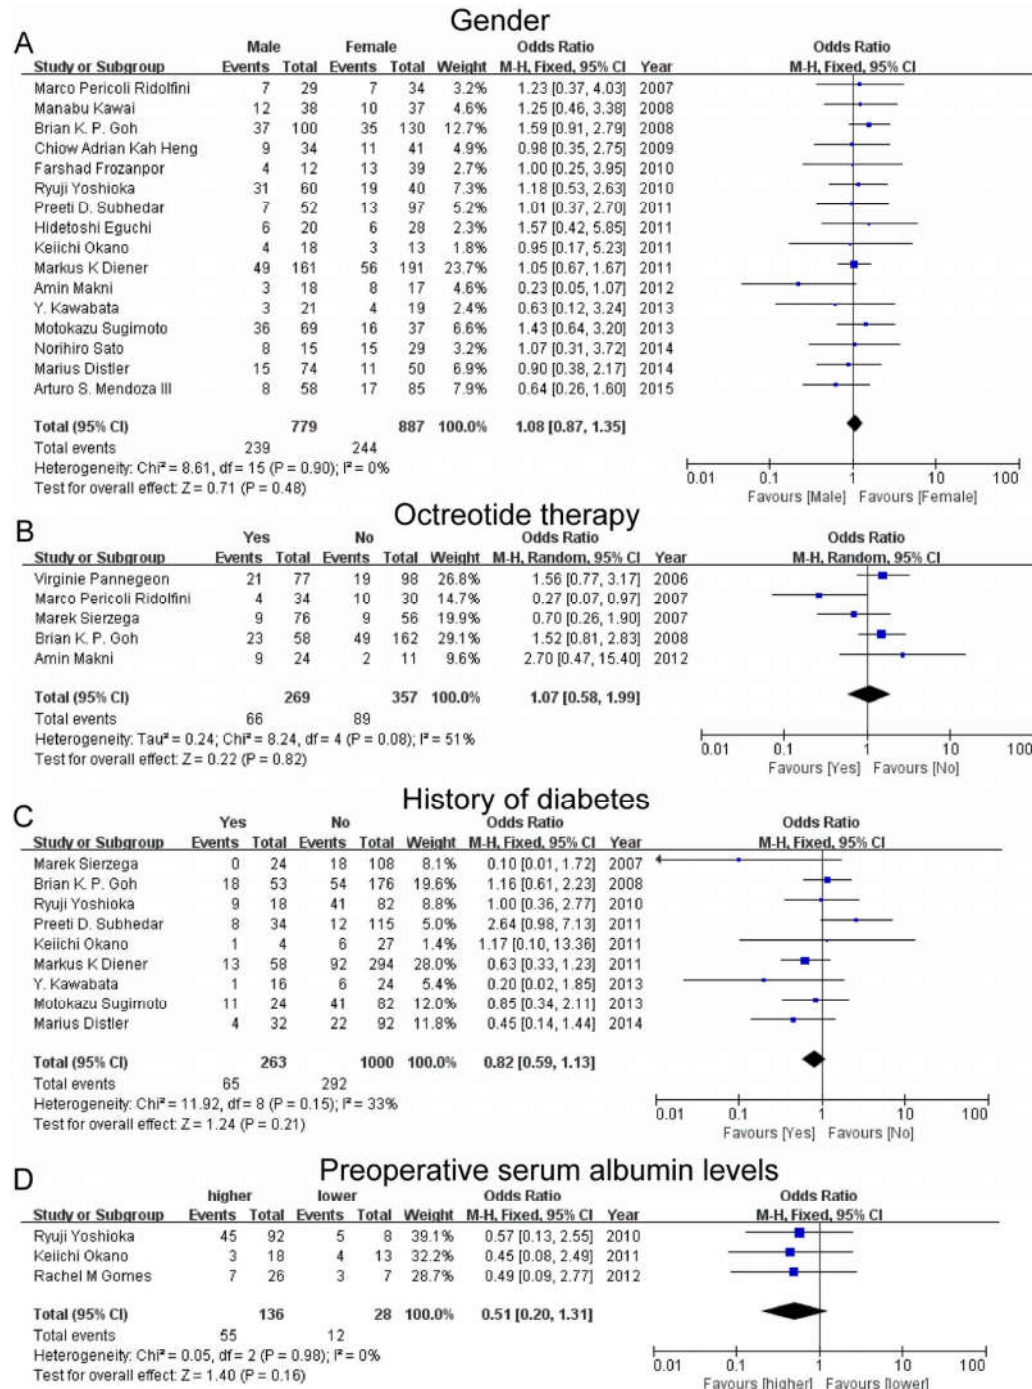

**Supplementary Fig 1.** Forest plot of the association between POPF and non-operation related risk factors. (A-D) The association between POPF and gender, octreotide therapy, history of diabetes, and preoperative serum albumin levels.

Supplementary Fig 2

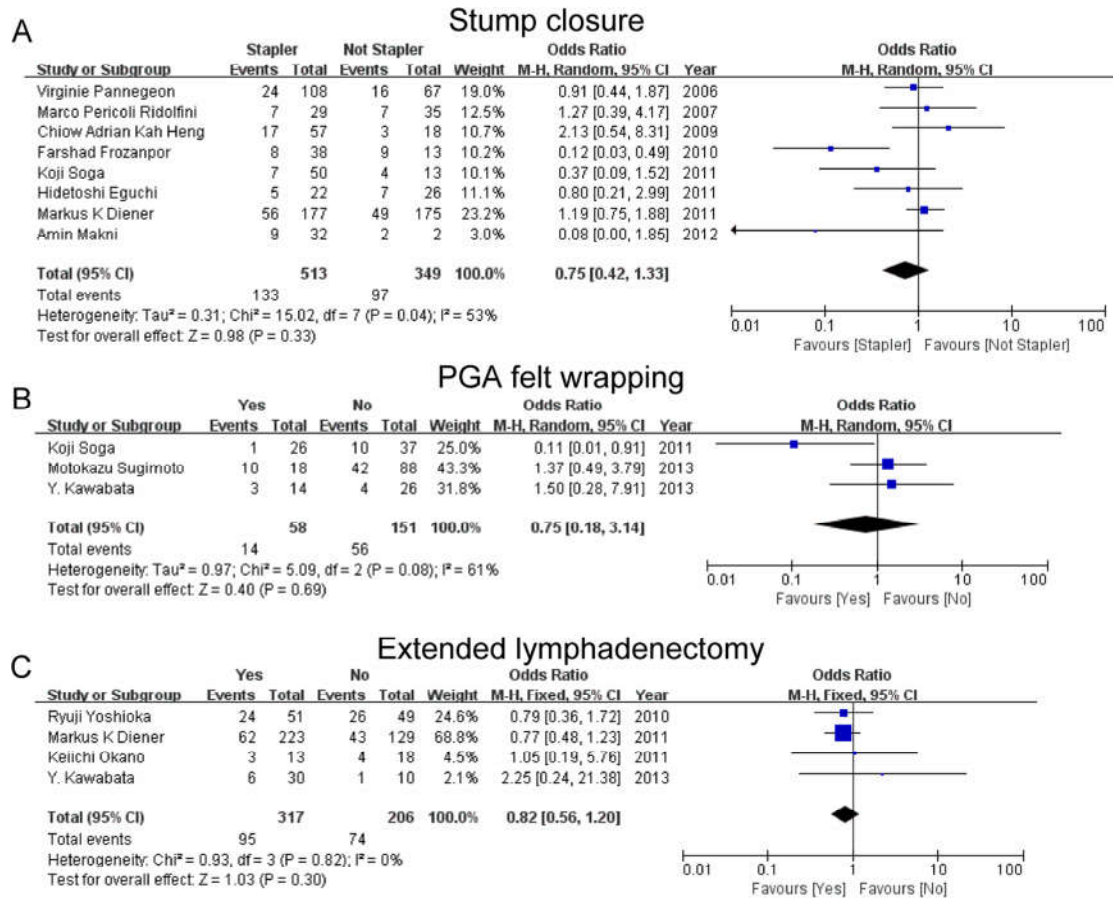

Supplementary Fig 2. Forest plot of the association between POPF and operation related risk factors. (A-C) The association between POPF and stump closure, PGA felt wrapping, and extended lymphadenectomy.

**Supplementary Table 1 Subgroup analysis between POPF and non-operation related risk factors according to the year of articles published.**

|                                          | Number<br>of<br>articles | OR   | 95% CI     | <i>P</i> | I <sup>2</sup> (%) | <i>P<sub>H</sub></i> |
|------------------------------------------|--------------------------|------|------------|----------|--------------------|----------------------|
| <b>Age</b>                               |                          |      |            |          |                    |                      |
| ≤2010                                    | 3                        | 0.83 | 0.29-2.35  | 0.720    | 69                 | 0.040                |
| >2010                                    | 7                        | 1.72 | 1.01-2.92  | 0.040    | 34                 | 0.170                |
| <b>Gender</b>                            |                          |      |            |          |                    |                      |
| ≤2010                                    | 6                        | 1.30 | 0.91-1.85  | 0.150    | 0                  | 0.960                |
| >2010                                    | 10                       | 0.96 | 0.73-1.28  | 0.800    | 0                  | 0.740                |
| <b>BMI</b>                               |                          |      |            |          |                    |                      |
| ≤2010                                    | 1                        | 1.88 | 0.63-5.65  |          |                    |                      |
| >2010                                    | 5                        | 2.28 | 1.33-3.91  | 0.003    | 24                 | 0.260                |
| <b>Malignant pathology</b>               |                          |      |            |          |                    |                      |
| ≤2010                                    | 7                        | 1.06 | 0.78-1.46  | 0.700    | 44                 | 0.100                |
| >2010                                    | 8                        | 0.72 | 0.51-1.01  | 0.060    | 0                  | 0.460                |
| <b>Octreotide therapy</b>                |                          |      |            |          |                    |                      |
| ≤2010                                    | 4                        | 0.96 | 0.49-1.88  | 0.910    | 59                 | 0.060                |
| >2010                                    | 1                        | 2.70 | 0.47-15.40 |          |                    |                      |
| <b>History of diabetes</b>               |                          |      |            |          |                    |                      |
| ≤2010                                    | 3                        | 0.89 | 0.53-1.49  | 0.660    | 33                 | 0.230                |
| >2010                                    | 6                        | 0.77 | 0.51-1.17  | 0.220    | 42                 | 0.130                |
| <b>History of chronic pancreatitis</b>   |                          |      |            |          |                    |                      |
| ≤2010                                    | 1                        | 0.76 | 0.37-1.57  | 0.460    |                    |                      |
| >2010                                    | 3                        | 1.24 | 0.33-4.71  | 0.750    | 71                 | 0.030                |
| <b>Preoperative serum albumin levels</b> |                          |      |            |          |                    |                      |
| ≤2010                                    | 1                        | 0.57 | 0.13-2.55  | 0.470    |                    |                      |
| >2010                                    | 2                        | 0.47 | 0.14-1.58  | 0.220    | 0                  | 0.940                |

**Supplementary Table 2 Subgroup analysis between POPF and non-operation related risk factors according to the sample size.**

|                                          | Number<br>of<br>articles | OR   | 95% CI     | <i>P</i> | I <sup>2</sup> (%) | <i>P<sub>H</sub></i> |
|------------------------------------------|--------------------------|------|------------|----------|--------------------|----------------------|
| <b>Age</b>                               |                          |      |            |          |                    |                      |
| ≥100                                     | 3                        | 0.84 | 0.31-2.24  | 0.730    | 61                 | 0.080                |
| <100                                     | 7                        | 1.76 | 1.03-2.99  | 0.040    | 35                 | 0.160                |
| <b>Gender</b>                            |                          |      |            |          |                    |                      |
| ≥100                                     | 7                        | 1.14 | 0.88-1.47  | 0.340    | 0                  | 0.720                |
| <100                                     | 9                        | 0.96 | 0.63-1.46  | 0.850    | 0                  | 0.800                |
| <b>BMI</b>                               |                          |      |            |          |                    |                      |
| ≥100                                     | 3                        | 2.15 | 1.20-3.86  | 0.010    | 0                  | 0.890                |
| <100                                     | 3                        | 2.22 | 0.44-11.32 | 0.340    | 61                 | 0.080                |
| <b>Malignant pathology</b>               |                          |      |            |          |                    |                      |
| ≥100                                     | 8                        | 0.76 | 0.58-0.99  | 0.040    | 8                  | 0.370                |
| <100                                     | 7                        | 1.53 | 0.93-2.53  | 0.100    | 13                 | 0.330                |
| <b>Octreotide therapy</b>                |                          |      |            |          |                    |                      |
| ≥100                                     | 3                        | 1.33 | 0.87-2.03  | 0.190    | 0                  | 0.380                |
| <100                                     | 2                        | 0.79 | 0.08-7.58  | 0.840    | 77                 | 0.040                |
| <b>History of diabetes</b>               |                          |      |            |          |                    |                      |
| ≥100                                     | 7                        | 0.85 | 0.61-1.18  | 0.320    | 40                 | 0.120                |
| <100                                     | 2                        | 0.40 | 0.08-1.95  | 0.260    | 10                 | 0.290                |
| <b>History of chronic pancreatitis</b>   |                          |      |            |          |                    |                      |
| ≥100                                     | 4                        | 1.08 | 0.45-2.62  | 0.860    | 64                 | 0.040                |
| <100                                     | 0                        |      |            |          |                    |                      |
| <b>Preoperative serum albumin levels</b> |                          |      |            |          |                    |                      |
| ≥100                                     | 1                        | 0.57 | 0.13-2.55  |          |                    |                      |
| <100                                     | 2                        | 0.47 | 0.14-1.58  | 0.220    | 0                  | 0.940                |

**Supplementary Table 3 Subgroup analysis between POPF and operation related risk factors according to the year of articles published.**

|                                  | Number<br>of articles | OR   | 95% CI    | <i>P</i> | I <sup>2</sup> (%) | <i>P<sub>H</sub></i> |
|----------------------------------|-----------------------|------|-----------|----------|--------------------|----------------------|
| <b>Pancreas texture</b>          |                       |      |           |          |                    |                      |
| ≤2010                            | 6                     | 2.87 | 1.40-5.88 | 0.004    | 55                 | 0.050                |
| >2010                            | 8                     | 1.02 | 0.64-1.63 | 0.920    | 28                 | 0.210                |
| <b>Types of stump closure</b>    |                       |      |           |          |                    |                      |
| ≤2010                            | 4                     | 0.77 | 0.28-2.13 | 0.610    | 69                 | 0.020                |
| >2010                            | 4                     | 0.98 | 0.65-1.47 | 0.910    | 41                 | 0.170                |
| <b>Blood transfusion</b>         |                       |      |           |          |                    |                      |
| ≤2010                            | 5                     | 1.39 | 0.96-2.00 | 0.080    | 0                  | 0.900                |
| >2010                            | 5                     | 2.83 | 1.26-6.36 | 0.010    | 0                  | 0.490                |
| <b>Intraoperative blood loss</b> |                       |      |           |          |                    |                      |
| ≤2010                            | 3                     | 1.63 | 1.01-2.63 | 0.010    | 39                 | 0.200                |
| >2010                            | 5                     | 3.92 | 2.04-7.55 | 0.000    | 0                  | 0.600                |
| <b>Operative time</b>            |                       |      |           |          |                    |                      |
| ≤2010                            | 2                     | 1.42 | 0.35-5.72 | 0.360    | 78                 | 0.030                |
| >2010                            | 5                     | 2.29 | 1.21-4.35 | 0.010    | 0                  | 0.620                |
| <b>Splenectomy</b>               |                       |      |           |          |                    |                      |
| ≤2010                            | 5                     | 1.13 | 0.46-2.82 | 0.790    | 56                 | 0.060                |
| >2010                            | 7                     | 0.75 | 0.35-1.59 | 0.450    | 51                 | 0.060                |
| <b>Multiorgan resection</b>      |                       |      |           |          |                    |                      |
| ≤2010                            | 5                     | 0.65 | 0.44-0.95 | 0.030    | 1                  | 0.400                |
| >2010                            | 3                     | 2.36 | 0.88-6.38 | 0.090    | 0                  | 0.980                |
| <b>Main duct ligation</b>        |                       |      |           |          |                    |                      |
| ≤2010                            | 3                     | 0.57 | 0.16-2.03 | 0.390    | 82                 | 0.004                |
| >2010                            | 4                     | 0.42 | 0.19-0.94 | 0.030    | 0                  | 0.400                |
| <b>PGA felt wrapping</b>         |                       |      |           |          |                    |                      |
| ≤2010                            | 0                     |      |           |          |                    |                      |
| >2010                            | 3                     | 0.75 | 0.18-3.14 | 0.690    | 61                 | 0.080                |
| <b>Extended lymphadenectomy</b>  |                       |      |           |          |                    |                      |
| ≤2010                            | 1                     | 0.79 | 0.36-1.72 | 0.550    |                    |                      |
| >2010                            | 3                     | 0.83 | 0.53-1.29 | 0.400    | 0                  | 0.630                |

**Supplementary Table 4 Subgroup analysis between POPF and operation related risk factors according to the sample size.**

|                                  | Number<br>of articles | OR   | 95% CI    | <i>P</i> | I <sup>2</sup> (%) | <i>P<sub>H</sub></i> |
|----------------------------------|-----------------------|------|-----------|----------|--------------------|----------------------|
| <b>Pancreas texture</b>          |                       |      |           |          |                    |                      |
| ≥100                             | 5                     | 1.02 | 0.68-1.55 | 0.910    | 45                 | 0.120                |
| <100                             | 9                     | 3.19 | 1.91-5.34 | 0.000    | 23                 | 0.240                |
| <b>Types of stump closure</b>    |                       |      |           |          |                    |                      |
| ≥100                             | 2                     | 1.10 | 0.75-1.62 | 0.620    | 0                  | 0.540                |
| <100                             | 6                     | 0.55 | 0.22-1.43 | 0.220    | 59                 | 0.030                |
| <b>Blood transfusion</b>         |                       |      |           |          |                    |                      |
| ≥100                             | 3                     | 1.49 | 0.99-2.25 | 0.050    | 0                  | 0.890                |
| <100                             | 7                     | 1.68 | 0.95-2.96 | 0.080    | 9                  | 0.360                |
| <b>Intraoperative blood loss</b> |                       |      |           |          |                    |                      |
| ≥100                             | 3                     | 2.04 | 1.27-3.28 | 0.003    | 56                 | 0.100                |
| <100                             | 5                     | 2.67 | 1.42-5.03 | 0.002    | 20                 | 0.290                |
| <b>Operative time</b>            |                       |      |           |          |                    |                      |
| ≥100                             | 2                     | 1.34 | 0.37-4.93 | 0.660    | 75                 | 0.050                |
| <100                             | 5                     | 2.37 | 1.25-4.51 | 0.008    | 0                  | 0.580                |
| <b>Splenectomy</b>               |                       |      |           |          |                    |                      |
| ≥100                             | 7                     | 1.08 | 0.54-2.17 | 0.820    | 62                 | 0.010                |
| <100                             | 5                     | 0.68 | 0.32-1.46 | 0.320    | 15                 | 0.320                |
| <b>Multiorgan resection</b>      |                       |      |           |          |                    |                      |
| ≥100                             | 3                     | 0.73 | 0.48-1.12 | 0.150    | 0                  | 0.390                |
| <100                             | 5                     | 0.87 | 0.45-1.70 | 0.690    | 47                 | 0.110                |
| <b>Main duct ligation</b>        |                       |      |           |          |                    |                      |
| ≥100                             | 4                     | 0.59 | 0.23-1.53 | 0.280    | 74                 | 0.010                |
| <100                             | 3                     | 0.31 | 0.11-0.90 | 0.030    | 11                 | 0.320                |
| <b>PGA felt wrapping</b>         |                       |      |           |          |                    |                      |
| ≥100                             | 1                     | 1.37 | 0.49-3.79 |          |                    |                      |
| <100                             | 2                     | 0.44 | 0.03-6.14 | 0.540    | 74                 | 0.050                |
| <b>Extended lymphadenectomy</b>  |                       |      |           |          |                    |                      |
| ≥100                             | 2                     | 0.77 | 0.52-1.16 | 0.210    | 0                  | 0.960                |
| <100                             | 2                     | 1.43 | 0.38-5.35 | 0.590    | 0                  | 0.600                |
